# Supplementary material
Source: PubMed Central journal article supplement (PMC4989264)
Supplement: aasm.39.9.1749s1.pdf [file aasm.39.9.1749s1.pdf]

**Table S1A—Adjusted associations of census tract-level neighborhood characteristics with sleep duration and sleep quality, The Jackson Heart Study, 2000-2004.**

|                        | Model 1                           |                                   |                                     | Model 2                           |                                   |                                     |
|------------------------|-----------------------------------|-----------------------------------|-------------------------------------|-----------------------------------|-----------------------------------|-------------------------------------|
|                        | OR of short sleep (vs. normal)    | OR of long sleep (vs. normal)     | Mean difference in minutes of sleep | OR of short sleep (vs. normal)    | OR of long sleep (vs. normal)     | Mean difference in minutes of sleep |
| <b>Social cohesion</b> |                                   |                                   |                                     |                                   |                                   |                                     |
| Low                    | 0.95<br>(0.81, 1.10)              | 0.81<br>(0.58, 1.14)              | -2.03<br>(-10.06, 6.01)             | 0.93<br>(0.79, 1.09)              | 0.76<br>(0.53, 1.09)              | -2.36<br>(-10.67, 5.94)             |
| Middle                 | 0.87<br>(0.74, 1.01) <sup>c</sup> | 0.70<br>(0.50, 0.99) <sup>b</sup> | -0.12<br>(-8.24, 8.00)              | 0.85<br>(0.73, 1.00) <sup>b</sup> | 0.70<br>(0.48, 1.00) <sup>b</sup> | 0.52<br>(-7.81, 8.84)               |
| High                   | REF                               | REF                               | REF                                 | REF                               | REF                               | REF                                 |
| <b>P-trend</b>         | 0.51                              | 0.27                              | 0.60                                | 0.37                              | 0.16                              | 0.55                                |
| <b>Violence</b>        |                                   |                                   |                                     |                                   |                                   |                                     |
| Low                    | REF                               | REF                               | REF                                 | REF                               | REF                               | REF                                 |
| Middle                 | 0.96<br>(0.82, 1.12)              | 1.17<br>(0.83, 1.66)              | 3.16<br>(-4.47, 10.81)              | 0.96<br>(0.81, 1.12)              | 1.12<br>(0.77, 1.61)              | 2.16<br>(-5.82, 10.15)              |
| High                   | 1.00<br>(0.85, 1.18)              | 0.82<br>(0.56, 1.19)              | -4.32<br>(-12.07, 3.42)             | 0.99<br>(0.84, 1.18)              | 0.78<br>(0.53, 1.16)              | -4.73<br>(-12.85, 3.38)             |
| <b>P-trend</b>         | 0.99                              | 0.20                              | 0.25                                | 0.95                              | 0.15                              | 0.24                                |
| <b>Problems</b>        |                                   |                                   |                                     |                                   |                                   |                                     |
| Low                    | REF                               | REF                               | REF                                 | REF                               | REF                               | REF                                 |
| Middle                 | 1.05<br>(0.90, 1.23)              | 1.26<br>(0.88, 1.80)              | -0.82<br>(-8.91, 7.27)              | 1.06<br>(0.90, 1.25)              | 1.22<br>(0.83, 1.78)              | -1.47<br>(-9.87, 6.92)              |
| High                   | 1.01<br>(0.86, 1.19)              | 0.96<br>(0.66, 1.39)              | -2.98<br>(-10.96, 4.99)             | 0.99<br>(0.84, 1.18)              | 0.96<br>(0.65, 1.41)              | -2.97<br>(-11.32, 5.38)             |
| <b>P-trend</b>         | 0.90                              | 0.65                              | 0.45                                | 0.93                              | 0.68                              | 0.48                                |

<sup>a</sup>P ≤ 0.01, <sup>b</sup>P ≤ 0.05, <sup>c</sup>P ≤ 0.10; Model 1 adjusted for age, sex, education, and income; Model 2 adjusted for Model 1+ marital status, physical activity, body mass index, diabetes, and hypertension; Model 1 sample size = 4411; Model 2 sample size = 4053

**Table S1B—Adjusted associations of census tract-level neighborhood characteristics with sleep duration and sleep quality among subsample with measures of depressive symptoms, The Jackson Heart Study, 2000-2004.**

|                        | Model 1                        |                                   |                                     | Model 2                           |                                   |                                     | Model 3                        |                               |                                     |
|------------------------|--------------------------------|-----------------------------------|-------------------------------------|-----------------------------------|-----------------------------------|-------------------------------------|--------------------------------|-------------------------------|-------------------------------------|
|                        | OR of short sleep (vs. normal) | OR of long sleep (vs. normal)     | Mean difference in minutes of sleep | OR of short sleep (vs. normal)    | OR of long sleep (vs. normal)     | Mean difference in minutes of sleep | OR of short sleep (vs. normal) | OR of long sleep (vs. normal) | Mean difference in minutes of sleep |
| <b>Social cohesion</b> |                                |                                   |                                     |                                   |                                   |                                     |                                |                               |                                     |
| Low                    | 1.08<br>(0.88, 1.31)           | 0.90<br>(0.59, 1.38)              | -2.99<br>(-12.82, 6.83)             | 1.01<br>(0.83, 1.25)              | 0.82<br>(0.53, 1.29)              | -2.18<br>(-12.38, 8.03)             | 1.01<br>(0.82, 1.24)           | 0.82<br>(0.52, 1.28)          | -1.56<br>(-11.43, 8.31)             |
| Middle                 | 0.88<br>(0.73, 1.07)           | 0.67<br>(0.42, 1.05) <sup>c</sup> | -2.08<br>(-11.95, 7.80)             | 0.84<br>(0.69, 1.03) <sup>c</sup> | 0.66<br>(0.41, 1.05) <sup>c</sup> | -0.16<br>(-10.37, 10.06)            | 0.85<br>(0.69, 1.04)           | 0.66<br>(0.41, 1.06)          | -0.59<br>(-10.46, 9.29)             |
| High                   | REF                            | REF                               | REF                                 | REF                               | REF                               | REF                                 | REF                            | REF                           | REF                                 |
| <b>P-trend</b>         | 0.48                           | 0.68                              | 0.55                                | 0.91                              | 0.42                              | 0.66                                | 0.96                           | 0.40                          | 0.75                                |
| <b>Violence</b>        |                                |                                   |                                     |                                   |                                   |                                     |                                |                               |                                     |
| Low                    | REF                            | REF                               | REF                                 | REF                               | REF                               | REF                                 | REF                            | REF                           | REF                                 |
| Middle                 | 1.04<br>(0.86, 1.26)           | 1.14<br>(0.74, 1.76)              | 0.83<br>(-8.58, 10.25)              | 1.02<br>(0.84, 1.25)              | 1.17<br>(0.74, 1.84)              | 1.13<br>(-8.71, 10.97)              | 1.00<br>(0.82, 1.22)           | 1.15<br>(0.73, 1.80)          | 2.99<br>(-6.46, 12.45)              |
| High                   | 1.09<br>(0.88, 1.34)           | 0.76<br>(0.47, 1.23)              | -6.48<br>(-16.28, 3.32)             | 1.04<br>(0.84, 1.30)              | 0.76<br>(0.46, 1.27)              | -4.92<br>(-15.14, 5.30)             | 1.00<br>(0.81, 1.25)           | 0.74<br>(0.44, 1.22)          | -2.65<br>(-12.53, 7.24)             |
| <b>P-trend</b>         | 0.42                           | 0.23                              | 0.19                                | 0.70                              | 0.27                              | 0.34                                | 0.96                           | 0.21                          | 0.58                                |
| <b>Problems</b>        |                                |                                   |                                     |                                   |                                   |                                     |                                |                               |                                     |
| Low                    | REF                            | REF                               | REF                                 | REF                               | REF                               | REF                                 | REF                            | REF                           | REF                                 |
| Middle                 | 1.10<br>(0.91, 1.34)           | 1.30<br>(0.84, 2.03)              | -1.57<br>(-11.34, 8.20)             | 1.07<br>(0.87, 1.31)              | 1.31<br>(0.82, 2.10)              | 0.03<br>(-10.09, 10.15)             | 1.06<br>(0.86, 1.30)           | 1.30<br>(0.82, 2.08)          | 0.89<br>(-8.90, 10.67)              |
| High                   | 1.10<br>(0.90, 1.35)           | 0.91<br>(0.57, 1.46)              | -5.16<br>(-14.98, 4.65)             | 1.04<br>(0.84, 1.28)              | 0.93<br>(0.57, 1.53)              | -3.36<br>(-13.58, 6.85)             | 1.00<br>(0.81, 1.24)           | 0.91<br>(0.55, 1.49)          | -1.44<br>(-11.37, 8.48)             |
| <b>P-trend</b>         | 0.34                           | 0.62                              | 0.30                                | 0.73                              | 0.70                              | 0.51                                | 0.96                           | 0.62                          | 0.77                                |

<sup>a</sup>P ≤ 0.01, <sup>b</sup>P ≤ 0.05, <sup>c</sup>P ≤ 0.10; Model 1 adjusted for age, sex, education and income; Model 2 adjusted for Model 1+ marital status, physical activity, body mass index, diabetes, and hypertension; Model 3 adjusted for Model 2 + depressive symptoms; Model 1 sample size=2,685; Model 2 & 3 sample size=2,491

**Table S2A—Adjusted associations of census tract-level neighborhood characteristics with sleep duration and sleep quality, The Jackson Heart Study, 2000-2004.**

|                         | Mean difference in sleep quality |                     |
|-------------------------|----------------------------------|---------------------|
|                         | Model 1                          | Model 2             |
| <b>Social cohesion*</b> |                                  |                     |
| Low                     | -0.02 (-0.10, 0.07)              | -0.02 (-0.10, 0.07) |
| Middle                  | -0.02 (-0.10, 0.07)              | -0.01 (-0.10, 0.07) |
| High                    | REF                              | REF                 |
| <b>P-trend</b>          | 0.67                             | 0.70                |
| <b>Violence*</b>        |                                  |                     |
| Low                     | REF                              | REF                 |
| Middle                  | 0.01 (-0.07, 0.09)               | -0.01 (-0.09, 0.07) |
| High                    | -0.03 (-0.11, 0.06)              | -0.03 (-0.12, 0.06) |
| <b>P-trend</b>          | 0.53                             | 0.48                |
| <b>Problems*</b>        |                                  |                     |
| Low                     | REF                              | REF                 |
| Middle                  | -0.001 (-0.08, 0.08)             | 0.007 (-0.08, 0.09) |
| High                    | -0.06 (-0.14, 0.02)              | -0.05 (-0.14, 0.03) |
| <b>P-trend</b>          | 0.15                             | 0.23                |

Model 1 adjusted for age, sex, education, and income

Model 2 adjusted for Model 1+ marital status, physical activity, body mass index, diabetes, and hypertension

Model 1 sample size = 4411; Model 2 sample size = 4053; \*census tract-level

**Table S2B—Adjusted associations of census tract-level neighborhood characteristics with sleep duration and sleep quality among subsample with measures of depressive symptoms, The Jackson Heart Study, 2000-2004.**

|                                    | Mean difference in sleep quality |                     |                     |
|------------------------------------|----------------------------------|---------------------|---------------------|
|                                    | Model 1                          | Model 2             | Model 2             |
| <b>Social cohesion<sup>^</sup></b> |                                  |                     |                     |
| Low                                | -0.02 (-0.13, 0.08)              | -0.02 (-0.13, 0.09) | -0.01 (-0.12, 0.08) |
| Middle                             | -0.03 (-0.13, 0.08)              | -0.01 (-0.12, 0.09) | -0.03 (-0.09, 0.11) |
| High                               | REF                              | REF                 | REF                 |
| <b>P-trend</b>                     | 0.63                             | 0.72                | 0.83                |
| <b>Violence<sup>^</sup></b>        |                                  |                     |                     |
| Low                                | REF                              | REF                 | REF                 |
| Middle                             | -0.01 (-0.11, 0.09)              | -0.02 (-0.13, 0.08) | 0.003 (-0.10, 0.10) |
| High                               | -0.02 (-0.13, 0.08)              | -0.01 (-0.12, 0.10) | 0.03 (-0.07, 0.14)  |
| <b>P-trend</b>                     | 0.65                             | 0.86                | 0.53                |
| <b>Problems<sup>^</sup></b>        |                                  |                     |                     |
| Low                                | REF                              | REF                 | REF                 |
| Middle                             | 0.02 (-0.08, 0.12)               | 0.03 (-0.07, 0.14)  | 0.05 (-0.06, 0.14)  |
| High                               | -0.04 (-0.15, 0.07)              | -0.03 (-0.14, 0.08) | 0.01 (-0.10, 0.12)  |
| <b>P-trend</b>                     | 0.46                             | 0.63                | 0.84                |

Model 1 adjusted for age, sex, education and income

Model 2 adjusted for Model 1+ marital status, physical activity, body mass index, diabetes, and hypertension

Model 3 adjusted for Model 2 + depressive symptoms

Model 1 sample size = 2,685; Model 2 & 3 sample size = 2,491; <sup>^</sup>census tract-level

**Table S3—Adjusted associations of individual-level socioeconomic position with sleep duration among subsample with measures of depressive symptoms, The Jackson Heart Study, 2000-2004.**

|                          | Model 1                        |                                   |                                     | Model 2                        |                                   |                                     | Model 3                           |                                   |                                      |
|--------------------------|--------------------------------|-----------------------------------|-------------------------------------|--------------------------------|-----------------------------------|-------------------------------------|-----------------------------------|-----------------------------------|--------------------------------------|
|                          | OR of short sleep (vs. normal) | OR of long sleep (vs. normal)     | Mean difference in minutes of sleep | OR of short sleep (vs. normal) | OR of long sleep (vs. normal)     | Mean difference in minutes of sleep | OR of short sleep (vs. normal)    | OR of long sleep (vs. normal)     | Mean difference in minutes of sleep  |
| <b>Income</b>            |                                |                                   |                                     |                                |                                   |                                     |                                   |                                   |                                      |
| Low                      | 1.20<br>(0.93, 1.56)           | 2.98<br>(1.75, 5.06) <sup>a</sup> | -2.17<br>(-13.17, 8.83)             | 1.09<br>(0.82, 1.45)           | 2.86<br>(1.59, 5.14) <sup>a</sup> | 0.79<br>(-11.13, 12.71)             | 0.87<br>(0.65, 1.17)              | 2.32<br>(1.27, 4.27) <sup>a</sup> | 11.94<br>(-0.21, 24.09) <sup>c</sup> |
| Lower Middle             | 1.20<br>(0.96, 1.49)           | 2.44<br>(1.50, 3.95) <sup>a</sup> | 0.84<br>(-8.52, 10.21)              | 1.11<br>(0.88, 1.41)           | 2.50<br>(1.49, 4.20) <sup>a</sup> | 3.77<br>(-6.23, 13.78)              | 0.98<br>(0.77, 1.25)              | 2.23<br>(1.32, 3.78) <sup>a</sup> | 9.76<br>(-0.25, 19.78) <sup>c</sup>  |
| Upper Middle             | 1.13<br>(0.93, 1.38)           | 1.19<br>(0.71, 2.00)              | -3.41<br>(-11.92, 5.09)             | 1.08<br>(0.88, 1.32)           | 1.09<br>(0.63, 1.89)              | -2.71<br>(-11.53, 6.10)             | 1.01<br>(0.82, 1.24)              | 1.03<br>(0.60, 1.79)              | 0.29<br>(-8.46, 9.04)                |
| High                     | REF                            | REF                               | REF                                 | REF                            | REF                               | REF                                 | REF                               | REF                               | REF                                  |
| <b>P-trend</b>           | 0.08                           | <0.01                             | 0.91                                | 0.41                           | <0.01                             | 0.61                                | 0.44                              | <0.01                             | 0.02                                 |
| <b>Education</b>         |                                |                                   |                                     |                                |                                   |                                     |                                   |                                   |                                      |
| <HS                      | 1.03<br>(0.81, 1.33)           | 2.35<br>(1.41, 3.94) <sup>a</sup> | 3.18<br>(-7.45, 13.82)              | 0.89<br>(0.68, 1.16)           | 2.12<br>(1.20, 3.75) <sup>a</sup> | 7.32<br>(-3.97, 18.61)              | 0.74<br>(0.56, 0.97) <sup>b</sup> | 1.78<br>(1.00, 3.18) <sup>b</sup> | 15.90<br>(4.58, 27.22) <sup>a</sup>  |
| HS/GED                   | 0.89<br>(0.72, 1.09)           | 1.74<br>(1.07, 2.82) <sup>b</sup> | 2.62<br>(-6.31, 11.55)              | 0.84<br>(0.67, 1.04)           | 1.99<br>(1.19, 3.34) <sup>a</sup> | 5.89<br>(-3.49, 15.28)              | 0.71<br>(0.56, 0.89) <sup>a</sup> | 1.71<br>(1.01, 2.89) <sup>b</sup> | 13.46<br>(4.02, 22.89) <sup>a</sup>  |
| >HS but <Bachelor Degree | 0.99<br>(0.83, 1.19)           | 2.17<br>(1.41, 3.35) <sup>a</sup> | 4.26<br>(-3.39, 11.92)              | 0.95<br>(0.79, 1.14)           | 2.41<br>(1.52, 3.82) <sup>a</sup> | 6.65<br>(-1.24, 14.55) <sup>c</sup> | 0.85<br>(0.71, 1.03)              | 2.19<br>(1.37, 3.48) <sup>a</sup> | 11.52<br>(3.64, 19.40) <sup>a</sup>  |
| College degree +         | REF                            | REF                               | REF                                 | REF                            | REF                               | REF                                 | REF                               | REF                               | REF                                  |
| <b>P-trend</b>           | 0.71                           | <0.01                             | 0.47                                | 0.16                           | <0.01                             | 0.12                                | <0.01                             | 0.07                              | <0.01                                |

<sup>a</sup>P ≤ 0.01, <sup>b</sup>P ≤ 0.05, <sup>c</sup>P ≤ 0.10

Model 1 adjusted for age and sex

Model 2 adjusted for Model 1+ marital status, physical activity, body mass index, diabetes, and hypertension

Model 3 adjusted for Model 2+ depressive symptoms

Model 1 sample size: income = 2,685, education = 3,121; Model 2 & 3 sample size: income = 2,491; education = 2,885

**Table S4—Adjusted associations of neighborhood characteristics with sleep duration among subsample with measures of depressive symptoms, The Jackson Heart Study, 2000-2004.**

|                                                             | Model 1                           |                               |                                       | Model 2                           |                               |                                       | Model 3                           |                                   |                                      |
|-------------------------------------------------------------|-----------------------------------|-------------------------------|---------------------------------------|-----------------------------------|-------------------------------|---------------------------------------|-----------------------------------|-----------------------------------|--------------------------------------|
|                                                             | OR of short sleep (vs. normal)    | OR of long sleep (vs. normal) | Mean difference in minutes of sleep   | OR of short sleep (vs. normal)    | OR of long sleep (vs. normal) | Mean difference in minutes of sleep   | OR of short sleep (vs. normal)    | OR of long sleep (vs. normal)     | Mean difference in minutes of sleep  |
| <b>Social cohesion*</b>                                     |                                   |                               |                                       |                                   |                               |                                       |                                   |                                   |                                      |
| Low                                                         | 0.88<br>(0.69, 1.11)              | 0.78<br>(0.46, 1.32)          | -2.48<br>(-12.21, 7.25)               | 0.81<br>(0.63, 1.04) <sup>c</sup> | 0.80<br>(0.45, 1.41)          | -0.66<br>(-10.72, 9.40)               | 0.75<br>(0.59, 0.97) <sup>a</sup> | 0.75<br>(0.43, 1.34)              | 2.34<br>(-7.65, 12.33)               |
| Middle                                                      | 0.95<br>(0.75, 1.21)              | 0.96<br>(0.56, 1.63)          | -0.66<br>(-10.47, 9.16)               | 0.96<br>(0.75, 1.22)              | 1.09<br>(0.63, 1.91)          | -0.79<br>(-10.80, 9.22)               | 0.95<br>(0.74, 1.22)              | 1.09<br>(0.62, 1.90)              | -0.72<br>(-10.63, 9.18)              |
| High                                                        | REF                               | REF                           | REF                                   | REF                               | REF                           | REF                                   | REF                               | REF                               | REF                                  |
| <b>P-trend</b>                                              | 0.28                              | 0.36                          | 0.62                                  | 0.10                              | 0.46                          | 0.35                                  | 0.03                              | 0.10                              | 0.67                                 |
| <b>Violence*</b>                                            |                                   |                               |                                       |                                   |                               |                                       |                                   |                                   |                                      |
| Low                                                         | REF                               | REF                           | REF                                   | REF                               | REF                           | REF                                   | REF                               | REF                               | REF                                  |
| High                                                        | 1.30<br>(1.06, 1.61) <sup>a</sup> | 1.26<br>(0.80, 2.01)          | -9.25<br>(-17.83, -0.67) <sup>b</sup> | 1.28<br>(1.03, 1.59) <sup>b</sup> | 1.26<br>(0.77, 2.05)          | -9.87<br>(-18.71, -1.03) <sup>b</sup> | 1.23<br>(0.99, 1.54) <sup>c</sup> | 1.22<br>(0.75, 2.00)              | -8.17<br>(-16.93, 0.60) <sup>c</sup> |
| <b>P-trend</b>                                              | ----                              | ----                          | ----                                  | ----                              | ----                          | ----                                  | ----                              | ----                              | ----                                 |
| <b>Problems*</b>                                            |                                   |                               |                                       |                                   |                               |                                       |                                   |                                   |                                      |
| Low                                                         | REF                               | REF                           | REF                                   | REF                               | REF                           | REF                                   | REF                               | REF                               | REF                                  |
| Middle                                                      | 1.10<br>(0.86, 1.39)              | 1.30<br>(0.77, 2.19)          | -2.08<br>(-11.95, 7.79)               | 1.12<br>(0.87, 1.43)              | 1.37<br>(0.79, 2.38)          | -2.09<br>(-12.17, 7.99)               | 1.09<br>(0.85, 1.39)              | 1.34<br>(0.77, 2.33)              | -0.91<br>(-10.89, 9.08)              |
| High                                                        | 1.11<br>(0.88, 1.41)              | 0.88<br>(0.50, 1.54)          | -8.68<br>(-18.61, 1.25) <sup>c</sup>  | 1.10<br>(0.86, 1.41)              | 0.88<br>(0.48, 1.60)          | -9.17<br>(-19.40, 1.07) <sup>c</sup>  | 1.03<br>(0.80, 1.32)              | 0.83<br>(0.46, 1.52)              | -6.39<br>(-16.56, 3.78)              |
| <b>P-trend</b>                                              | 0.36                              | 0.67                          | 0.09                                  | 0.44                              | 0.71                          | 0.08                                  | 0.80                              | 0.58                              | 0.22                                 |
| <b>Census-derived Neighborhood Disadvantage<sup>^</sup></b> |                                   |                               |                                       |                                   |                               |                                       |                                   |                                   |                                      |
| Low                                                         | REF                               | REF                           | REF                                   | REF                               | REF                           | REF                                   | REF                               | REF                               | REF                                  |
| Middle                                                      | 1.06<br>(0.87, 1.29)              | 1.08<br>(0.68, 1.71)          | -3.46<br>(-13.38, 6.46)               | 1.05<br>(0.86, 1.29)              | 1.19<br>(0.73, 1.96)          | -2.35<br>(-12.58, 7.88)               | 1.03<br>(0.84, 1.27)              | 1.17<br>(0.71, 1.92)              | -0.37<br>(-10.20, 9.46)              |
| High                                                        | 1.01<br>(0.82, 1.23)              | 1.21<br>(0.77, 1.89)          | 1.15<br>(-8.84, 11.15)                | 1.00<br>(0.81, 1.23)              | 1.42<br>(0.88, 2.29)          | 2.26<br>(-8.13, 12.66)                | 0.98<br>(0.80, 1.22)              | 1.40<br>(0.87, 2.26) <sup>c</sup> | 3.48<br>(-6.51, 13.48)               |
| <b>P-trend</b>                                              | 0.93                              | 0.38                          | 0.80                                  | 0.98                              | 0.14                          | 0.65                                  | 0.89                              | 0.15                              | 0.48                                 |

<sup>a</sup>P<0.01, <sup>b</sup>P≤0.05, <sup>c</sup>P≤0.10; Model 1 adjusted for age, sex, education, income; Model 2 adjusted for Model 1+ marital status, physical activity, body mass index, diabetes, and hypertension; Model 3 adjusted for Model 2 + depressive symptoms; Model 1 sample size = 1,754 except: neighborhood disadvantage = 2,685; Model 2 & 3 sample size = 1,639 except: neighborhood disadvantage = 2,491; \*Self-reported neighborhood characteristic, ^Census tract-level neighborhood

**Table S5—Adjusted associations of individual socioeconomic position, neighborhood characteristics with sleep quality among subsample with measures of depressive symptoms, The Jackson Heart Study, 2000-2004.**

|                                                             | Mean difference in sleep quality  |                                   |                                  |
|-------------------------------------------------------------|-----------------------------------|-----------------------------------|----------------------------------|
|                                                             | Model 1                           | Model 2                           | Model 3                          |
| <b>Individual SEP</b>                                       |                                   |                                   |                                  |
| <b>Income</b>                                               |                                   |                                   |                                  |
| Low                                                         | -0.43 (-0.56, -0.29) <sup>a</sup> | -0.34 (-0.49, -0.20) <sup>a</sup> | -0.06 (-0.21, 0.08)              |
| Lower-Middle                                                | -0.25 (-0.36, -0.14) <sup>a</sup> | -0.19 (-0.32, -0.07) <sup>a</sup> | -0.04 (-0.16, 0.07)              |
| Upper- Middle                                               | -0.20 (-0.31, -0.10) <sup>a</sup> | -0.17 (-0.28, -0.07) <sup>a</sup> | -0.10 (-0.20, 0.00)              |
| High                                                        | REF                               | REF                               | REF                              |
| <b>P-trend</b>                                              | <0.01                             | <0.01                             | 0.06                             |
| <b>Education</b>                                            |                                   |                                   |                                  |
| <HS                                                         | -0.27 (-0.41, -0.14) <sup>a</sup> | -0.20 (-0.34, -0.06) <sup>a</sup> | 0.01 (-0.12, 0.14)               |
| HS/GED                                                      | -0.25 (-0.36, -0.14) <sup>a</sup> | -0.20 (-0.31, -0.08) <sup>a</sup> | -0.01 (-0.13, 0.10)              |
| >HS but <Bachelor degree                                    | -0.18 (-0.27, -0.08) <sup>a</sup> | -0.14 (-0.24, -0.04) <sup>a</sup> | -0.02 (-0.12, 0.07)              |
| College degree +                                            | REF                               | REF                               | REF                              |
| <b>P-trend</b>                                              | <0.01                             | <0.01                             | 0.98                             |
| <b>Neighborhood Factors</b>                                 |                                   |                                   |                                  |
| <b>Social cohesion*</b>                                     |                                   |                                   |                                  |
| Low                                                         | -0.04 (-0.17, 0.08)               | -0.03 (-0.16, 0.10)               | 0.05 (-0.07, 0.18)               |
| Middle                                                      | -0.05 (-0.18, 0.07)               | -0.08 (-0.21, 0.05)               | -0.08 (-0.20, 0.04)              |
| High                                                        | REF                               | REF                               | REF                              |
| <b>P-trend</b>                                              | 0.46                              | 0.61                              | 0.46                             |
| <b>Violence*</b>                                            |                                   |                                   |                                  |
| Low                                                         | REF                               | REF                               | REF                              |
| High                                                        | -0.14 (-0.25, -0.03) <sup>a</sup> | -0.15 (-0.27, -0.04) <sup>a</sup> | -0.10 (-0.21, 0.00) <sup>b</sup> |
| <b>P-trend</b>                                              | ----                              | ----                              | ----                             |
| <b>Problems*</b>                                            |                                   |                                   |                                  |
| Low                                                         | REF                               | REF                               | REF                              |
| Middle                                                      | -0.07 (-0.19, 0.06)               | -0.08 (-0.21, 0.05)               | -0.05 (-0.17, 0.08)              |
| High                                                        | -0.12 (-0.24, 0.01) <sup>c</sup>  | -0.11 (-0.24, 0.02)               | -0.03 (-0.15, 0.10)              |
| <b>P-trend</b>                                              | 0.07                              | 0.10                              | 0.66                             |
| <b>Census-derived Neighborhood Disadvantage<sup>^</sup></b> |                                   |                                   |                                  |
| Low                                                         | REF                               | REF                               | REF                              |
| Middle                                                      | 0.03 (-0.07, 0.13)                | 0.03 (-0.08, 0.13)                | 0.05 (-0.05, 0.16)               |
| High                                                        | 0.05 (-0.06, 0.15)                | 0.05 (-0.06, 0.16)                | 0.07 (-0.03, 0.17)               |
| <b>P-trend</b>                                              | 0.36                              | 0.38                              | 0.19                             |

<sup>a</sup>P ≤ 0.01, <sup>b</sup>P < 0.05, <sup>c</sup>P < 0.05; Model 1 adjusted for age, sex, education and income (neighborhood characteristic models); Model 2 adjusted for Model 1 + marital status, physical activity, body mass index, diabetes, and hypertension; Model 3 adjusted for Model 2 + depressive symptoms; \*Self-reported neighborhood characteristic, <sup>^</sup>Census tract-level neighborhood characteristic; Model 1 sample size = 3,121 except: income status = 2,685; self-reported neighborhood characteristics = 1,754, neighborhood disadvantage = 2,685; Model 2 & 3 sample size = 2,885 except: income status = 2,491; self-reported neighborhood characteristics = 1,639, neighborhood disadvantage = 2,491.
